# Supplementary material for: Polymeric Micelles with pH-Responsive Cross-Linked Core Enhance In Vivo mRNA Delivery
Source: Pharmaceutics. 2022 Jun 6;14(6):1205. doi: 10.3390/pharmaceutics14061205 (PMC9231146; doi:10.3390/pharmaceutics14061205)
Supplement: Supplementary file 1 [file pharmaceutics-14-01205-s001.zip › pharmaceutics-1721973-supplementary.pdf]

# Supplementary Materials: Polymeric micelles with pH-responsive cross-linked core enhance *in vivo* mRNA delivery

Wenqian Yang, Pengwen Chen, Eger Boonstra, Taehun Hong and Horacio Cabral \*

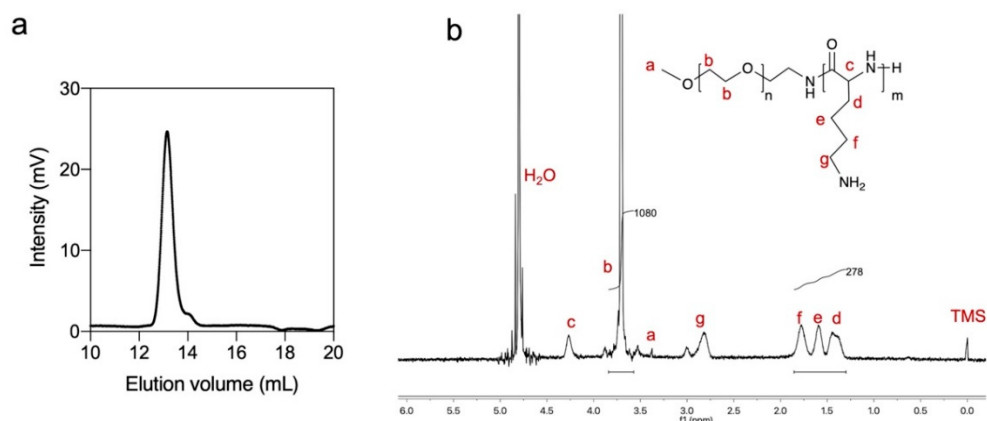

**Figure S1.** (a) GPC chromatogram of PEG-pLL(TFA) (1 mg/mL, solvent: DMF with 10 mM lithium chloride, temperature: 40 °C, flow rate: 0.8 mL min<sup>-1</sup>) (b) <sup>1</sup>H-NMR of PEG-pLL (polymer concentration: 10 mg/mL, solvent: D<sub>2</sub>O, and temperature: 25 °C).

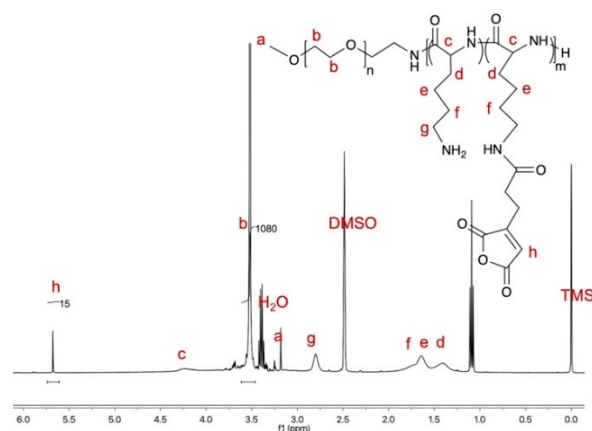

**Figure S2.** <sup>1</sup>H-NMR of PEG-pLL(CAA) (polymer concentration: 10 mg/mL, solvent: DMSO-d<sub>6</sub>, and temperature: 80 °C).

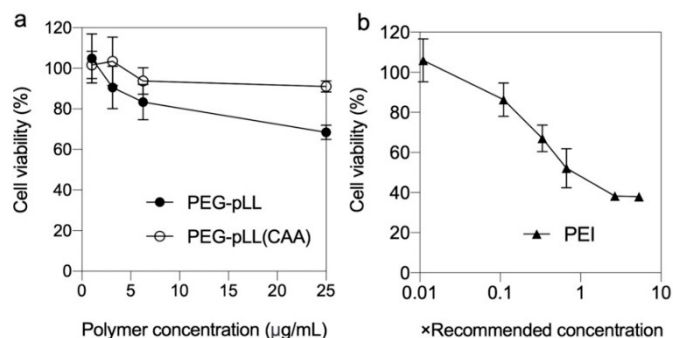

**Figure S3.** Viability of CT26 cells by CCK-8 assay after incubation with (a) polymers at 1 µg/mL, 3 µg/mL, 6 µg/mL and 25 µg/mL and (b) PEI at 0.01×, 0.1×, 0.3×, 2.5× and 5× the recommended concentration for 24 h. Error bars represent s.d. (*n* = 3 wells).
